# Supplementary material for: An Effective Electrochemical Platform for Chloramphenicol Detection Based on Carbon-Doped Boron Nitride Nanosheets
Source: MDPI journal article supplement (doi:10.3390/bios13010116), 2023-01-09
Supplement: s1 [file s1]

Supporting information

# An Effective Electrochemical Platform for Chloramphenicol Detection Based on Carbon-Doped Boron Nitride Nanosheets

Jingli Yin <sup>1,2</sup>, Huiying Ouyang <sup>1,2</sup>, Weifeng Li <sup>1</sup> and Yumei Long <sup>1,2,\*</sup>

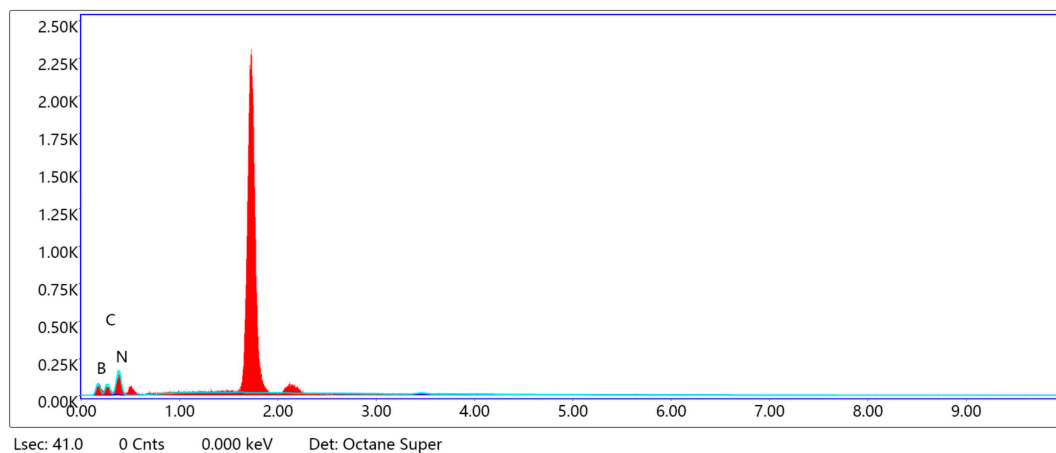

**Figure S1.** EDS profile for C-BN.

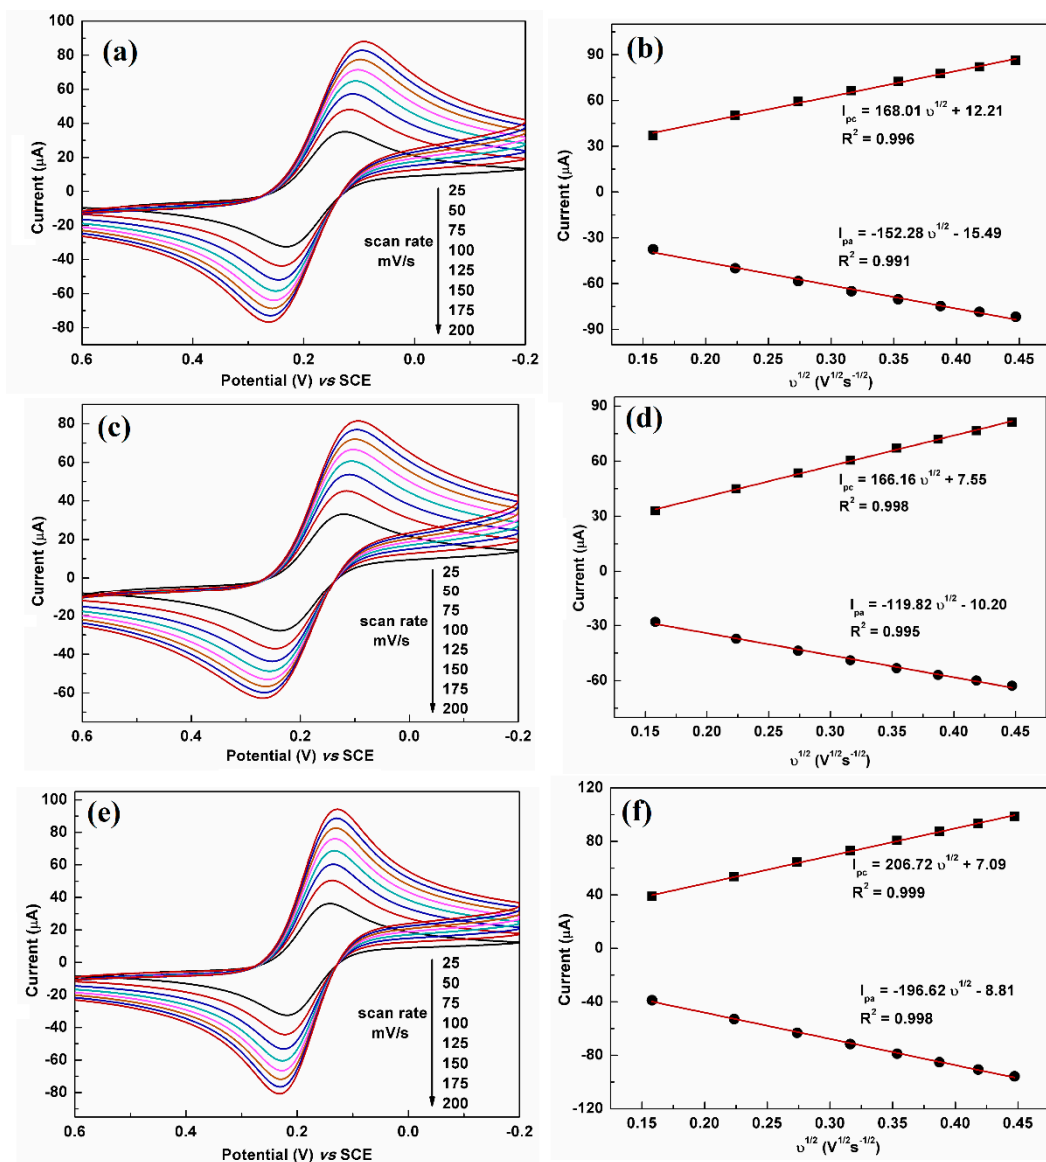

**Figure S2.** CVs of (a) bare GCE, (c) *h*-BN/GCE and (e) C-BN/GCE at different scan rate (25 – 200 mV/s). Plots of the redox peak current ( $I_p$ ) versus the square root of the scan rate ( $v^{1/2}$ ) at (b) bare GCE, (d) *h*-BN/GCE and (f) C-BN/GCE. All the tests were conducted in 0.1 M KCl solution containing 1 mM  $[\text{Fe}(\text{CN})_6]^{3-/4-}$ .

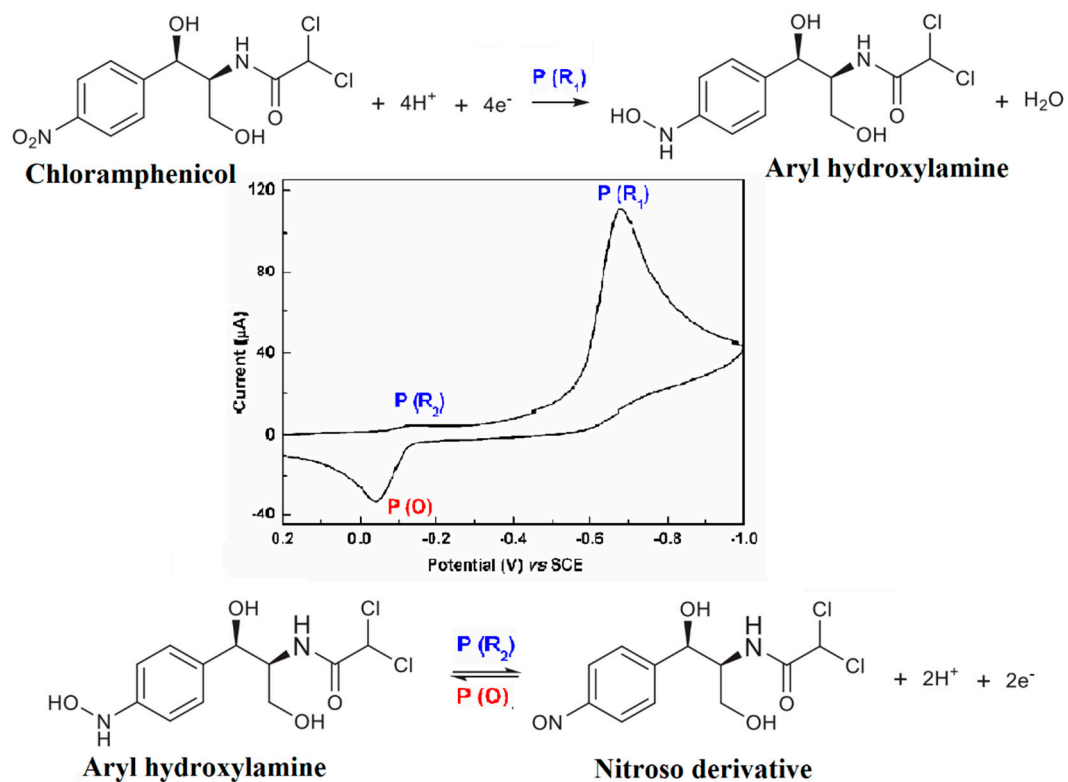

**Figure S3.** The possible electrochemical reaction mechanism of CAP at C-BN/GCE.
